# Supplementary material for: Bombyx mori Nuclear Polyhedrosis Virus (BmNPV) Induces Host Cell Autophagy to Benefit Infection
Source: PubMed Central journal article supplement (PMC5795427; doi:10.3390/v10010014), 2017-12-30
Supplement: viruses-10-00014-s001.pdf [file viruses-10-00014-s001.pdf]

Supplementary Materials

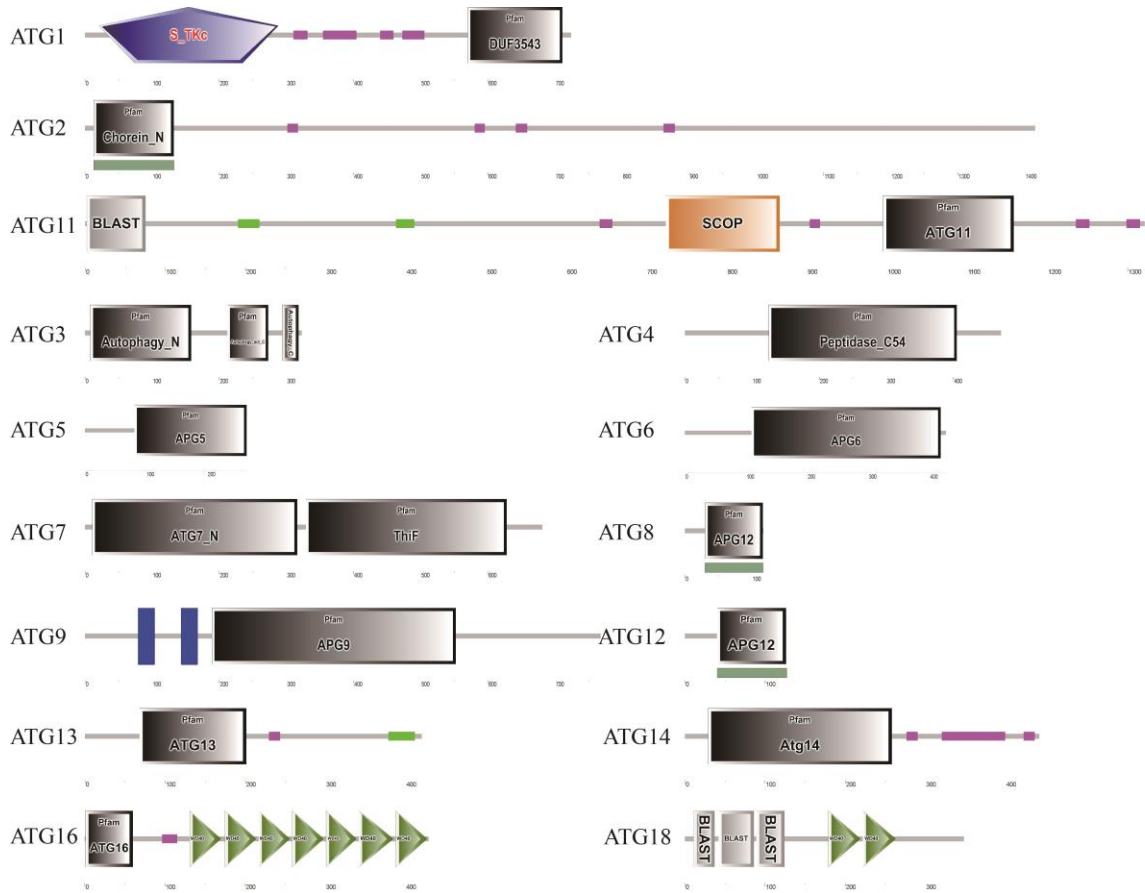

**Figure S1.** Fifteen autophagy-related genes in *Bombyx mori* have their conserved domains as predicted by SMART (<http://smart.embl-heidelberg.de/>).

**Table S1.** Function of autophagy-related genes.

| Atg genes | Aliases       | Complexes                               | Function                                                                                                                                |
|-----------|---------------|-----------------------------------------|-----------------------------------------------------------------------------------------------------------------------------------------|
| Atg1      | ULK           | ULK complex                             | Phosphorylates Atg9(1) and Atg6(2) as a Ser/Thr kinase; regulates autophagy                                                             |
| Atg11     | Atg17/FIP200  | (induction of                           | Mediates mTor signaling to autophagy with ULK-Atg13(3)                                                                                  |
| Atg13     | APG13         | autophagy)                              | Interaction with Atg1(4) and regulates localization to the PAS(5)                                                                       |
| Atg9      | APG9/CVT6     | ATG9L complex                           | Recruitment of PI3K complex(6) and Atg proteins(1)                                                                                      |
| Atg6      | VPS30/Beclin1 | ATG14L                                  | Component of class III PI3K complexes(7); binds Atg14 and Rubicon(8, 9)                                                                 |
| Atg14     | APG14         | complex(apg-specific<br>PI(3)K complex) | Localizes on the ER to induce autophagy(10)                                                                                             |
| Atg2      | APG2          | Atg2-Atg18 complex                      | Localizes to some membranous structure and is essential for autophagy(11)                                                               |
| Atg18     | WIPI          |                                         | Binds to Atg16L1 and recruits ATG16 complex to APS(12)                                                                                  |
| Atg5      | APG5          | Atg16L1 complex (as                     | Conjugates to Atg12 to form ATG16L1 complex(13); involves in sequestration(14)                                                          |
| Atg7      | APG7          | E3-like enzyme for                      | Mediates the conjugation of Atg5 and Atg12 as an E1-like enzyme(15)                                                                     |
| Atg12     | APG12         | LC3-PE)                                 | Conjugates to Atg5 to form ATG16L1 complex(13)                                                                                          |
| Atg16     | APG16/CVT11   |                                         | Forms a 2:2:2 complex with Atg12-Atg5 as E3-like enzyme for LC3-PE                                                                      |
| Atg8      | LC3           | ATG8-II ubiquitin-like                  | Marker and closure of isolated membrane(16); quantification of autophagy activity(17)                                                   |
| Atg3      |               | conjugation system                      | Mediates LC3 conjugating to PE as a E2-like enzyme with Atg7(18)                                                                        |
| Atg4      |               |                                         | Cleaves the C-terminal arginine of Atg8(19) and Mediates LC3 deconjugating from the outer autophagosomal and LAP phagosome membrane(20) |
| Atg7      |               |                                         | Mediates LC3 conjugating to PE as a E1-like enzyme with Atg3(18)                                                                        |

- Papinski D, Schuschnig M, Reiter W, et al. Early steps in autophagy depend on direct phosphorylation of Atg9 by the Atg1 kinase. *Molecular cell*. 2014;53(3):471-83. doi:10.1016/j.molcel.2013.12.011
- Russell RC, Tian Y, Yuan H, et al. ULK1 induces autophagy by phosphorylating Beclin-1 and activating VPS34 lipid kinase. *Nature cell biology*. 2013;15(7):741-50. doi:10.1038/ncb2757
- Jung CH, Jun CB, Ro SH, et al. ULK-Atg13-FIP200 complexes mediate mTOR signaling to the autophagy machinery. *Molecular biology of the cell*. 2009;20(7):1992-2003. doi:10.1091/mbc.E08-12-1249
- Kamada Y, Yoshino K, Kondo C, et al. Tor directly controls the Atg1 kinase complex to regulate autophagy. *Molecular and cellular biology*. 2010;30(4):1049-58. doi:10.1128/MCB.01344-09
- Stephan JS, Yeh YY, Ramachandran V, Deminoff SJ, Herman PK. The Tor and PKA signaling pathways independently target the Atg1/Atg13 protein kinase complex to control autophagy. *Proceedings of the National Academy of Sciences of the United States of America*. 2009;106(40):17049-54. doi:10.1073/pnas.0903316106
- Kageyama S, Omori H, Saitoh T, et al. The LC3 recruitment mechanism is separate from Atg9L1-dependent membrane formation in the autophagic response against Salmonella. *Molecular biology of the cell*. 2011;22(13):2290-300. doi:10.1091/mbc.E10-11-0893
- Kihara A, Noda T, Ishihara N, Ohsumi Y. Two distinct Vps34 phosphatidylinositol 3-kinase complexes function in autophagy and carboxypeptidase Y sorting in *Saccharomyces cerevisiae*. *The Journal of cell biology*. 2001;152(3):519-30.
- Matsunaga K, Saitoh T, Tabata K, et al. Two Beclin 1-binding proteins, Atg14L and Rubicon, reciprocally regulate autophagy at different stages. *Nature cell biology*. 2009;11(4):385-96. doi:10.1038/ncb1846
- Zhong Y, Wang QJ, Li X, et al. Distinct regulation of autophagic activity by Atg14L and Rubicon associated with Beclin 1-phosphatidylinositol-3-kinase complex. *Nature cell biology*. 2009;11(4):468-76.

doi:10.1038/ncb1854

10. Matsunaga K, Morita E, Saitoh T, et al. Autophagy requires endoplasmic reticulum targeting of the PI3-kinase complex via Atg14L. *The Journal of cell biology*. 2010;190(4):511-21. doi:10.1083/jcb.200911141
11. Shintani T, Suzuki K, Kamada Y, Noda T, Ohsumi Y. Apg2p functions in autophagosome formation on the perivacuolar structure. *The Journal of biological chemistry*. 2001;276(32):30452-60. doi:10.1074/jbc.M102346200
12. Dooley HC, Razi M, Polson HE, Girardin SE, Wilson MI, Tooze SA. WIPI2 links LC3 conjugation with PI3P, autophagosome formation, and pathogen clearance by recruiting Atg12-5-16L1. *Molecular cell*. 2014;55(2):238-52. doi:10.1016/j.molcel.2014.05.021
13. Matsushita M, Suzuki NN, Obara K, Fujioka Y, Ohsumi Y, Inagaki F. Structure of Atg5-Atg16, a complex essential for autophagy. *The Journal of biological chemistry*. 2007;282(9):6763-72. doi:10.1074/jbc.M609876200
14. George MD, Baba M, Scott SV, et al. Apg5p functions in the sequestration step in the cytoplasm-to-vacuole targeting and macroautophagy pathways. *Molecular biology of the cell*. 2000;11(3):969-82.
15. Kim J, Dalton VM, Eggerton KP, Scott SV, Klionsky DJ. Apg7p/Cvt2p is required for the cytoplasm-to-vacuole targeting, macroautophagy, and peroxisome degradation pathways. *Molecular biology of the cell*. 1999;10(5):1337-51.
16. Fujita N, Hayashi-Nishino M, Fukumoto H, et al. An Atg4B mutant hampers the lipidation of LC3 paralogues and causes defects in autophagosome closure. *Molecular biology of the cell*. 2008;19(11):4651-9. doi:10.1091/mbc.E08-03-0312
17. Kabeya Y, Mizushima N, Ueno T, et al. LC3, a mammalian homologue of yeast Apg8p, is localized in autophagosome membranes after processing. *The EMBO journal*. 2000;19(21):5720-8. doi:10.1093/emboj/19.21.5720
18. Nakatogawa H, Suzuki K, Kamada Y, Ohsumi Y. Dynamics and diversity in autophagy mechanisms: lessons from yeast. *Nature reviews. Molecular cell biology*. 2009;10(7):458-67. doi:10.1038/nrm2708
19. Kirisako T, Ichimura Y, Okada H, et al. The reversible modification regulates the membrane-binding state of Apg8/Aut7 essential for autophagy and the cytoplasm to vacuole targeting pathway. *The Journal of cell biology*. 2000;151(2):263-76.
20. Nakatogawa H, Ishii J, Asai E, Ohsumi Y. Atg4 recycles inappropriately lipidated Atg8 to promote autophagosome biogenesis. *Autophagy*. 2012;8(2):177-86. doi:10.4161/auto.8.2.18373

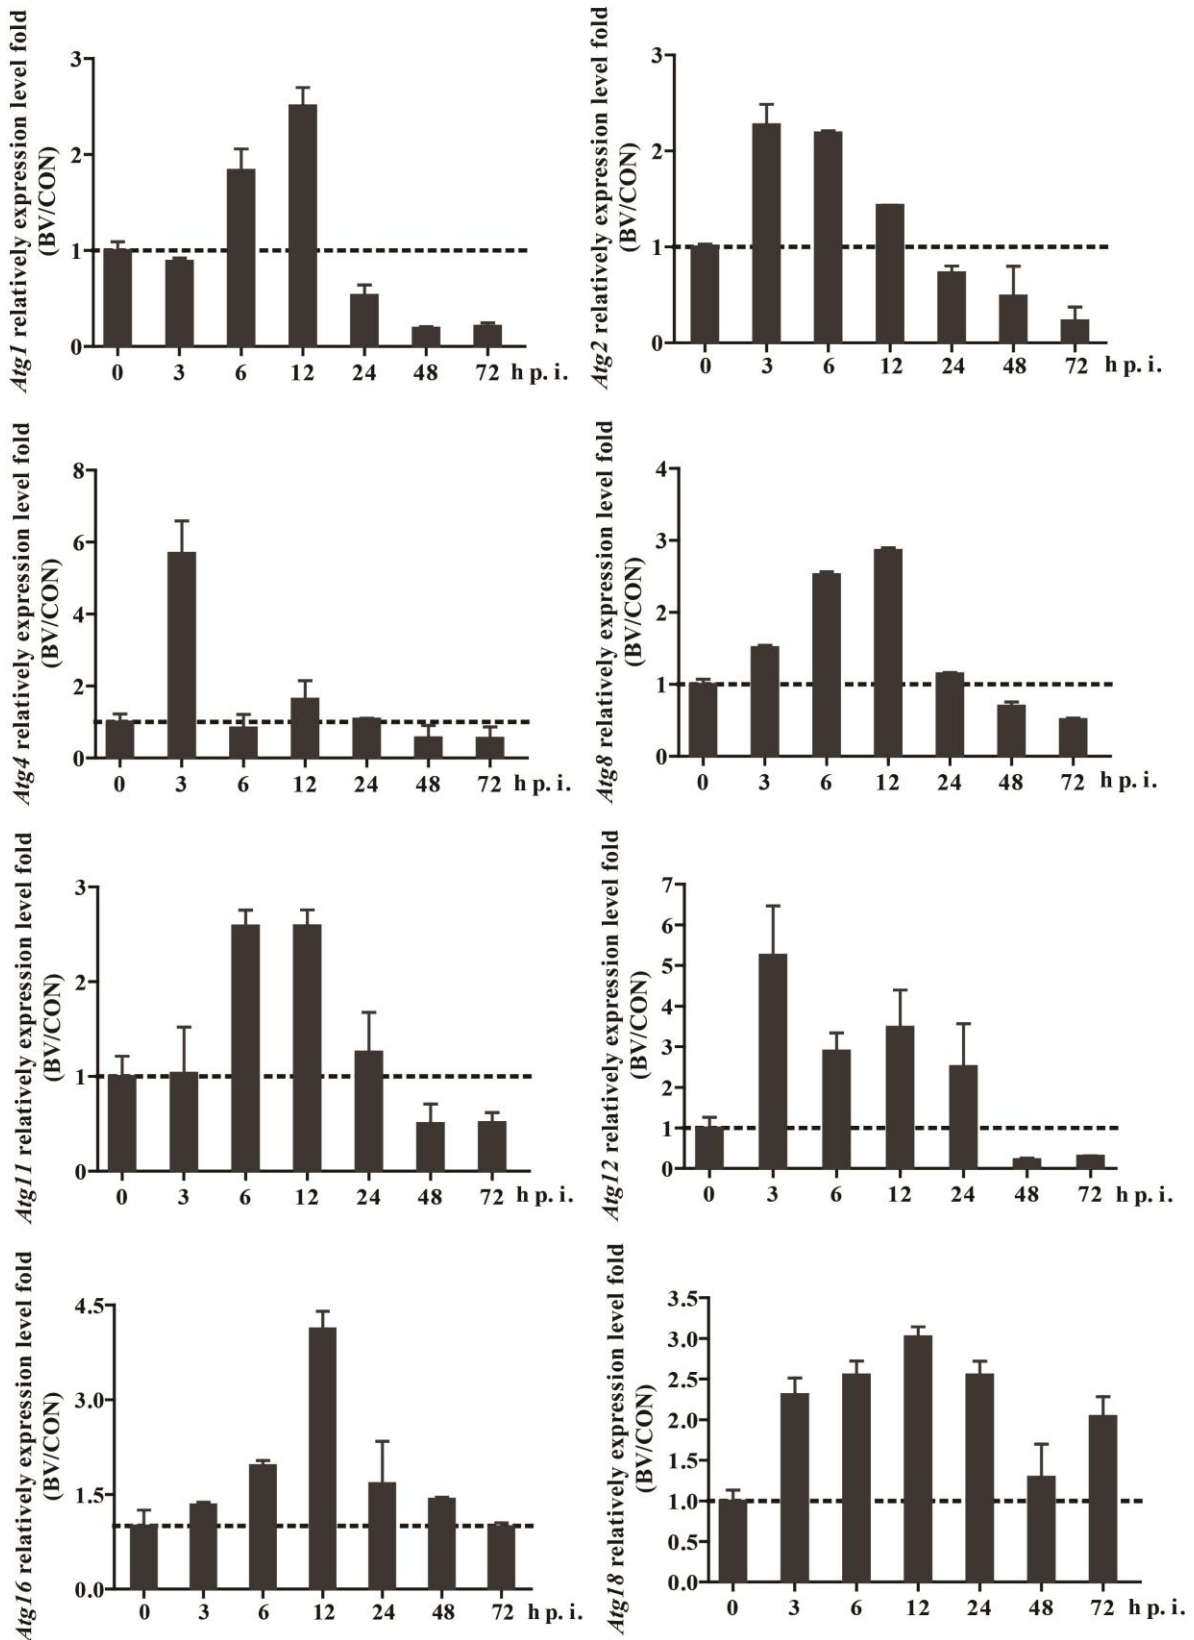

**Figure S2.** BmNPV infection caused the expression level change of autophagy-related genes. *Atg1, 2, 4, 8, 11, 12, 16, and 18* expression-level fold changes to control are listed after infection.

ATG3 22.2%

```
TGGCCGGTTACTTGACACCGGTGTTGAAGGTACGTTTATCAGCATCATTATTAATTACATACATATTGAAATT
TGGCCGGTT-----GTGTTGAAGGTACGTTTATCAGCATCATTATTAATTACATACATATTGAAATT
TGGCCGG-----CATACATATTGAAATT
TGGCC-----
TGGCCGGTT-----TTGACACCGGTGTTGAAGGTACGTTTATCAGCATCATTATTAATTACATACATATTGAAATT
TGGCCGG-----TTGAAATT
TGGCCGGTT-----TTGAAATT
```

ATG4 33%

```
CTCATACCCACTGACAAACGCTCGAGACAATGCTGAAGATTCAATTGA
CTCATACCCAC--GACAAACGCTCGAGACAATGCTGAAGATTCAATTGA
CTCATACCCAC-----AAACGCTCGAGACAATGCTGAAGATTCAATTGA
CTCATACCC-----CGCTCGAGACAATGCTGAAGATTCAATTGA
CTCATACCCACTG-----CGAGACAATGCTGAAGATTCAATTGA
CTCATACCCAC-----AACGCTCGAGACAATGCTGAAGATTCAATTGA
CTCATACCCAC-----ACAATGCTGAAGATTCAATTGA
```

ATG5 25%

```
TTTTCCATCCCATAATTCTCGAAGTACCTCCCTGTCGTTGGCCATAAGGG
TTTTCCATCCCAT---TTCTCGAAGTACCTCCCTGTCGTTGGCC---AAGGG
TTTTCCATCC-A-ATTCTCGAAGTACCTCCCTGTCGTTGGCCATAAGGG
TTTTCCATCC-A- ----GAAGTACCTCCCTGTCGTTGGCCATAAGGG
TTTTCCAT-----CTCCCTGTCGTTGGCCATAAGGG
TTTTCCATC-----GAAGTACCTCCCTGTCGTTGGCCATAAGGG
```

ATG7 22.2%

```
AATATTTGTTGGTAGTTTCCTTTAATTTGCTACTTCTAATTTTCATTTCAGTGAGGGTATGCCAGAATGA
AATATTTGTTGGTAGTTTCCTTTAATTTGCTACTTCTAATTTTCATT----- -GA
AATATTTGTTGGTAGTTTCCTTTAATTTGCTCTG----- A
AATATTTGTTGGTAGTTTCCT-----ATGA
AATATTTGTTGGTAGTTTCCTTTAATTTGCTACTTCTAATTTTCATT-----GA
AATATTTGTTGGTAGTTTCCTTTAATTTGCTACTTCTATG-----A
AATATTTGTTGGTAGTTTCCTTTAATTTGCTACTTCTAATTTTCATT-----TGA
```

ATG9 25%

```
CCTTAGGTTGGATTGGCTGACAATGTGAACATAACGTCGCCTAAAGGCAGTGTAGATGCTGATCATGAAGATTACAGTAAGGTGATCATCCACGAAGTGC
CCTT--AGTGGATTGGCTGACAATGTGAACATAACGTCGCCTAAAGGCAGTGTAGATGCTGATCATGAAGATTACAGTAAGGTGATCATCCACGAAGTGC
CCTT-----GGATTGGCTGACAATGTGAACATAACGTCGCCTAAAGGCAGTGTAGATGCTGATCATGAAGATTACAGTAAGGTGATCATCCACGAAGTGC
CTTTAG---TGGATTGGCTGACAATGTGAACATAACGTCGC-TAAAGGCAGTGTAGATGCTGATCATGAAGATTACAGTAAGGTGATCATCCACGAAGTGC
CCTGGAT-----TGGCTGACAATGTGAACATAACGTCGCCTAAAGGCAGTGTAGATGCTGATCATGAAGATTACAGTAAGGTGATCATCCACGAAGTGC
CCTAAG-----TGC
```

ATG12 42%

```
AAACTCCATAATCCATCCAATAGGCTTTTCAGCATCAACAGCCCATTTTTTTTCTTC
AAACTCCATAATCCATCCAATA----CTTTTCAGCATCAACAGCCCATTTTTTTT-CTTC
AAACTCCATAATCCATCCAATA-----CATCAACAGCCCATTTTTTTTCTTC
AAACTCCATAATCCATCCAATA--GCTTTTCAGCATCAACAGCCCATTTTTTTT-CTTC
AAACTCCATAATCCATCCAATA-----CAACAGCCCATTTTTTTTCTTC
AAACTCCATAATCCATCCAATAAG-----CATCAACAGCCCATTTTTTTTCTTC
AAACTCCATAATCCATCCGATA-----ATCAACAGCCCATTTTTTTTCTTC
AAACTCCATAATCCATCCAAT-----ATTTTTTTTCTTC
AAACT-----GGCTTTTCAGCATCAACAGCCCATTTTTTTTCTTC
```

**Figure S3.** Knockout efficiency of autophagy-related genes was analyzed through PCR and ligated into the pMD19-T vector for sequencing using M13 primers. *Atg3*, *4*, *5*, *7*, *9*, and *12* are knocked down through the CRISPR/Cas9 gene editing system.
